# Supplementary material for: Two pillared-layer metal–organic frameworks constructed with Co(ii), 1,2,4,5-benzenetetracarboxylate, and 4,4′-bipyridine: syntheses, crystal structures, and gas adsorption properties
Source: Royal Society of Chemistry journal article supplement (doi:10.1039/c2ce05586d), 2012-01-01
Supplement: c2ce05586d.pdf [file c2ce05586d.pdf]

Two pillared-layer metal-organic frameworks constructed with Co(II), 1,2,4,5-benzenetetracarboxylate, and 4,4'-bipyridine: syntheses, crystal structures, and gas adsorption properties

*Ping Song, Bin Liu, Yaoqi Li, Junzhi Yang, Zheming Wang, and Xingguo Li\**

Beijing National Laboratory for Molecular Sciences (BNLMS), (The State Key Laboratory of Rare Earth Materials Chemistry and Applications), College of Chemistry and Molecular Engineering, Peking University, Beijing, 100871, China

\*To whom correspondence should be addressed. E-mail: [xgli@pku.edu.cn](mailto:xgli@pku.edu.cn).

## Supporting Information

Table S1. Selected Bond Lengths (Å) and angles (°) for compound 1.

|                     |            |
|---------------------|------------|
| Co(1)-O(2)#1        | 2.0598(16) |
| Co(1)-O(7)#2        | 2.0696(15) |
| Co(1)-O(4)#1        | 2.1143(15) |
| Co(1)-O(1)          | 2.1177(15) |
| Co(1)-N(2)          | 2.143(2)   |
| Co(1)-N(1)#3        | 2.2089(18) |
| Co(2)-O(6)#4        | 2.0732(17) |
| Co(2)-O(3)          | 2.0924(16) |
| Co(2)-O(8)#4        | 2.0965(15) |
| Co(2)-O(9)          | 2.1057(16) |
| Co(2)-N(3)#5        | 2.138(2)   |
| Co(2)-N(4)          | 2.1709(19) |
| O(2)#1-Co(1)-O(7)#2 | 173.88(6)  |
| O(2)#1-Co(1)-O(4)#1 | 85.54(6)   |
| O(7)#2-Co(1)-O(4)#1 | 91.21(6)   |
| O(2)#1-Co(1)-O(1)   | 89.49(6)   |
| O(7)#2-Co(1)-O(1)   | 85.65(6)   |
| O(4)#1-Co(1)-O(1)   | 95.47(6)   |
| O(2)#1-Co(1)-N(2)   | 90.51(7)   |
| O(7)#2-Co(1)-N(2)   | 92.52(7)   |
| O(4)#1-Co(1)-N(2)   | 175.49(7)  |
| O(1)-Co(1)-N(2)     | 82.30(7)   |
| O(2)#1-Co(1)-N(1)#3 | 90.56(7)   |
| O(7)#2-Co(1)-N(1)#3 | 94.96(7)   |
| O(4)#1-Co(1)-N(1)#3 | 96.32(7)   |
| O(1)-Co(1)-N(1)#3   | 168.18(7)  |
| N(2)-Co(1)-N(1)#3   | 85.88(7)   |
| O(6)#4-Co(2)-O(3)   | 175.11(6)  |
| O(6)#4-Co(2)-O(8)#4 | 86.33(7)   |
| O(3)-Co(2)-O(8)#4   | 91.27(6)   |
| O(6)#4-Co(2)-O(9)   | 90.45(7)   |
| O(3)-Co(2)-O(9)     | 94.04(7)   |
| O(8)#4-Co(2)-O(9)   | 95.80(6)   |
| O(6)#4-Co(2)-N(3)#5 | 91.08(8)   |
| O(3)-Co(2)-N(3)#5   | 91.12(8)   |
| O(8)#4-Co(2)-N(3)#5 | 176.34(8)  |
| O(9)-Co(2)-N(3)#5   | 86.80(8)   |
| O(6)#4-Co(2)-N(4)   | 88.28(7)   |
| O(3)-Co(2)-N(4)     | 87.34(7)   |
| O(8)#4-Co(2)-N(4)   | 87.07(7)   |
| O(9)-Co(2)-N(4)     | 176.78(7)  |

N(3)#5-Co(2)-N(4) 90.27(8)

Symmetry transformations used to generate equivalent atoms: #1  $-x+1,-y,-z+1$  #2  $-x+2,-y,-z+1$   
#3  $x,y,z+1$  #4  $x-1,y,z$  #5  $-x+1,-y+1,-z+1$  #6  $x+1,y,z$  #7  $x,y,z-1$

Table S2. Selected Bond Lengths (Å) and angles (°) for compound **2**.

|                     |            |
|---------------------|------------|
| Co(1)-O(5)          | 2.0510(19) |
| Co(1)-O(4)#1        | 2.0676(18) |
| Co(1)-N(1)          | 2.089(2)   |
| Co(1)-O(1)          | 2.1242(19) |
| Co(1)-O(3)#1        | 2.2391(17) |
| Co(1)-O(2)          | 2.2492(19) |
| Co(1)-C(4)#1        | 2.474(2)   |
| Co(1)-C(1)          | 2.503(3)   |
| O(5)-Co(1)-O(4)#1   | 100.46(8)  |
| O(5)-Co(1)-N(1)     | 94.80(8)   |
| O(4)#1-Co(1)-N(1)   | 101.65(8)  |
| O(5)-Co(1)-O(1)     | 93.18(8)   |
| O(4)#1-Co(1)-O(1)   | 159.88(8)  |
| N(1)-Co(1)-O(1)     | 91.78(8)   |
| O(5)-Co(1)-O(3)#1   | 91.07(7)   |
| O(4)#1-Co(1)-O(3)#1 | 60.69(7)   |
| N(1)-Co(1)-O(3)#1   | 162.19(8)  |
| O(1)-Co(1)-O(3)#1   | 104.69(7)  |
| O(5)-Co(1)-O(2)     | 150.15(8)  |
| O(4)#1-Co(1)-O(2)   | 103.33(8)  |
| N(1)-Co(1)-O(2)     | 97.77(8)   |
| O(1)-Co(1)-O(2)     | 59.57(7)   |
| O(3)#1-Co(1)-O(2)   | 85.13(7)   |
| O(5)-Co(1)-C(4)#1   | 96.77(8)   |
| O(4)#1-Co(1)-C(4)#1 | 30.44(8)   |
| N(1)-Co(1)-C(4)#1   | 132.05(9)  |
| O(1)-Co(1)-C(4)#1   | 133.57(8)  |
| O(3)#1-Co(1)-C(4)#1 | 30.25(8)   |
| O(2)-Co(1)-C(4)#1   | 94.69(8)   |
| O(5)-Co(1)-C(1)     | 121.65(9)  |
| O(4)#1-Co(1)-C(1)   | 131.57(9)  |
| N(1)-Co(1)-C(1)     | 97.77(8)   |
| O(1)-Co(1)-C(1)     | 30.02(8)   |
| O(3)#1-Co(1)-C(1)   | 93.39(7)   |
| O(2)-Co(1)-C(1)     | 29.70(7)   |
| C(4)#1-Co(1)-C(1)   | 114.59(9)  |

Symmetry transformations used to generate equivalent atoms: #1  $x,-y+3/2,z+1/2$  #2  
 $x,-y+3/2,z-1/2$  #3  $-x+1,-y+1,-z+1$  #4  $-x,-y+2,-z$

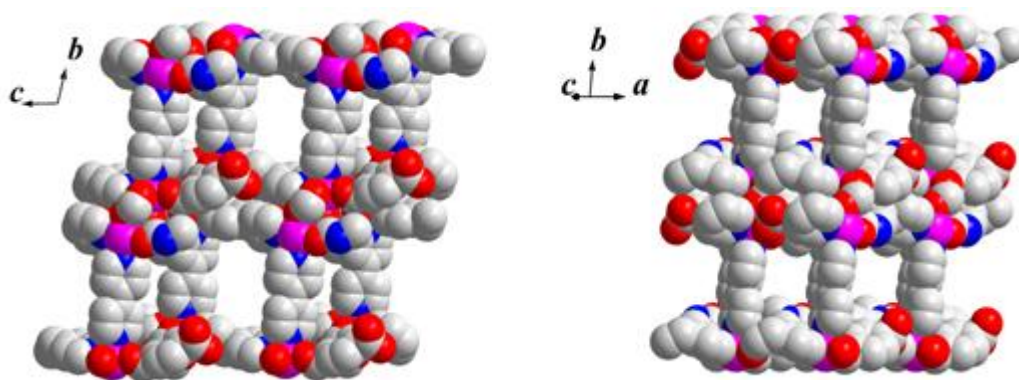

Fig. S1 Packing diagram of compound **1** along the a) [100] and b) [101] directions.

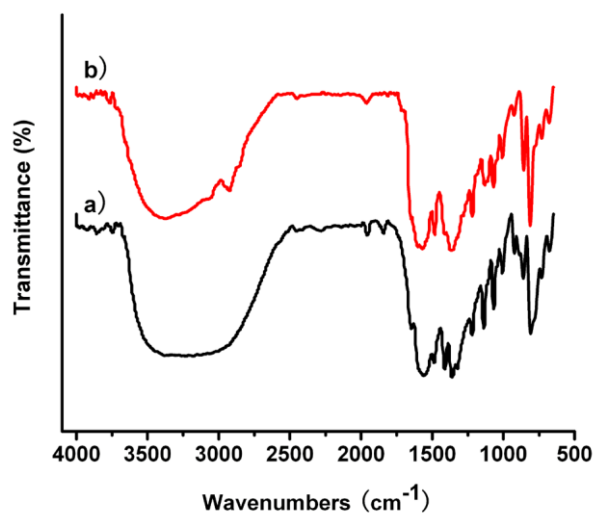

Fig. S2. IR spectra of compound **1**: a) as-synthesized; b) evacuated at 120°C for 2 h.

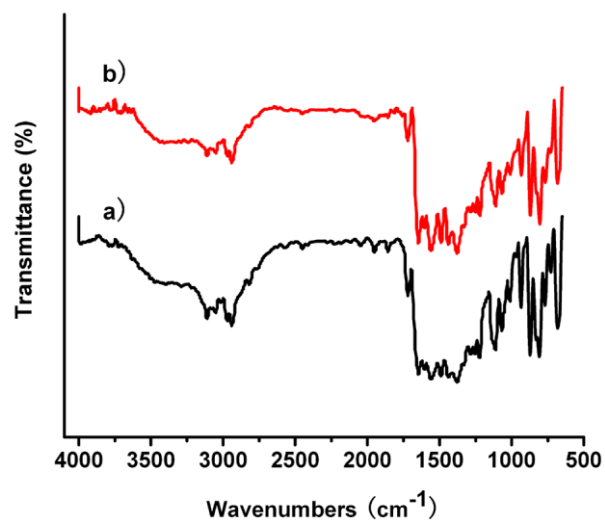

Fig. S3. IR spectra of compound **2**: a) as synthesized; b) evacuated at 120°C for 2 h.

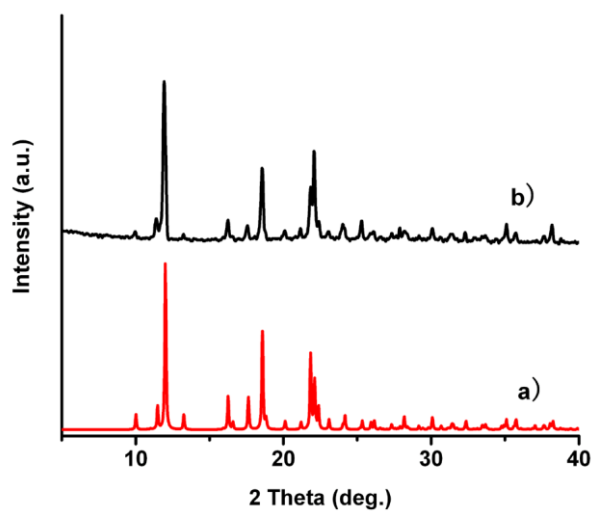

Fig. S4. PXRD patterns of a) the simulation, b) the as-synthesized sample of compound 2.

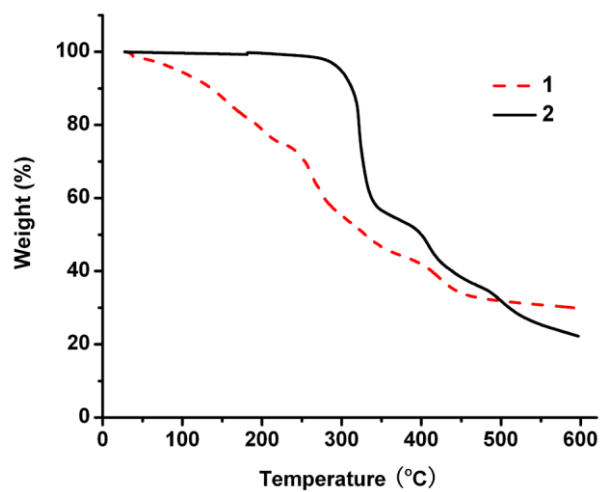

Fig. S5. TGA curves of 1 (dash), 2 (solid)

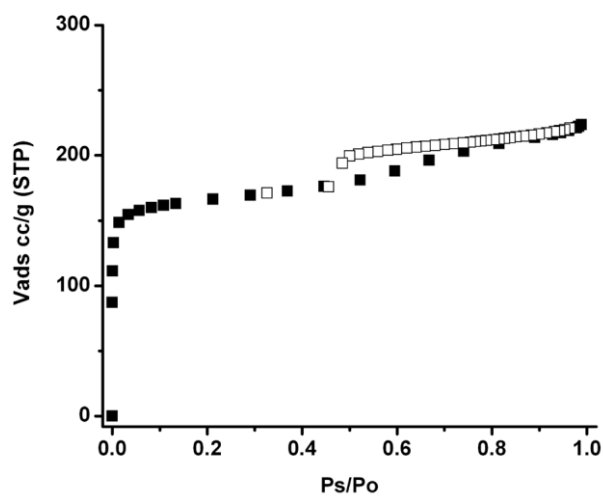

Fig. S6.  $\text{N}_2$  isotherms for compound 1 at 77 K. The shaded symbols and open symbols represent adsorption and desorption, respectively.

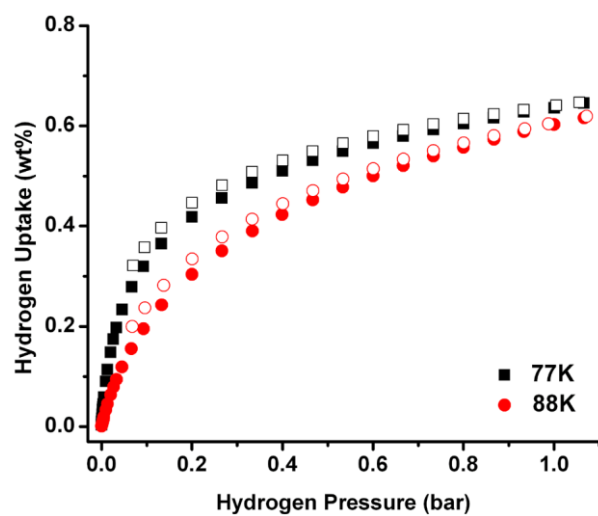

Fig. S7. The H<sub>2</sub> isotherms of **1** at 77 K and 88 K under 0-1 bar.
